# Supplementary material for: Intrinsically disordered substrates dictate SPOP subnuclear localization and ubiquitination activity
Source: PubMed Central journal article supplement (PMC8138767; doi:10.1016/j.jbc.2021.100693), 2021-04-22
Supplement: mmc1.pdf [file mmc1.pdf]

## **Supporting Information**

### **Intrinsically disordered substrates dictate SPOP subnuclear localization and ubiquitination activity**

Emery T. Usher, Nafiseh Sabri, Roman Rohac, Amie K. Boal, Tanja Mittag, Scott A. Showalter

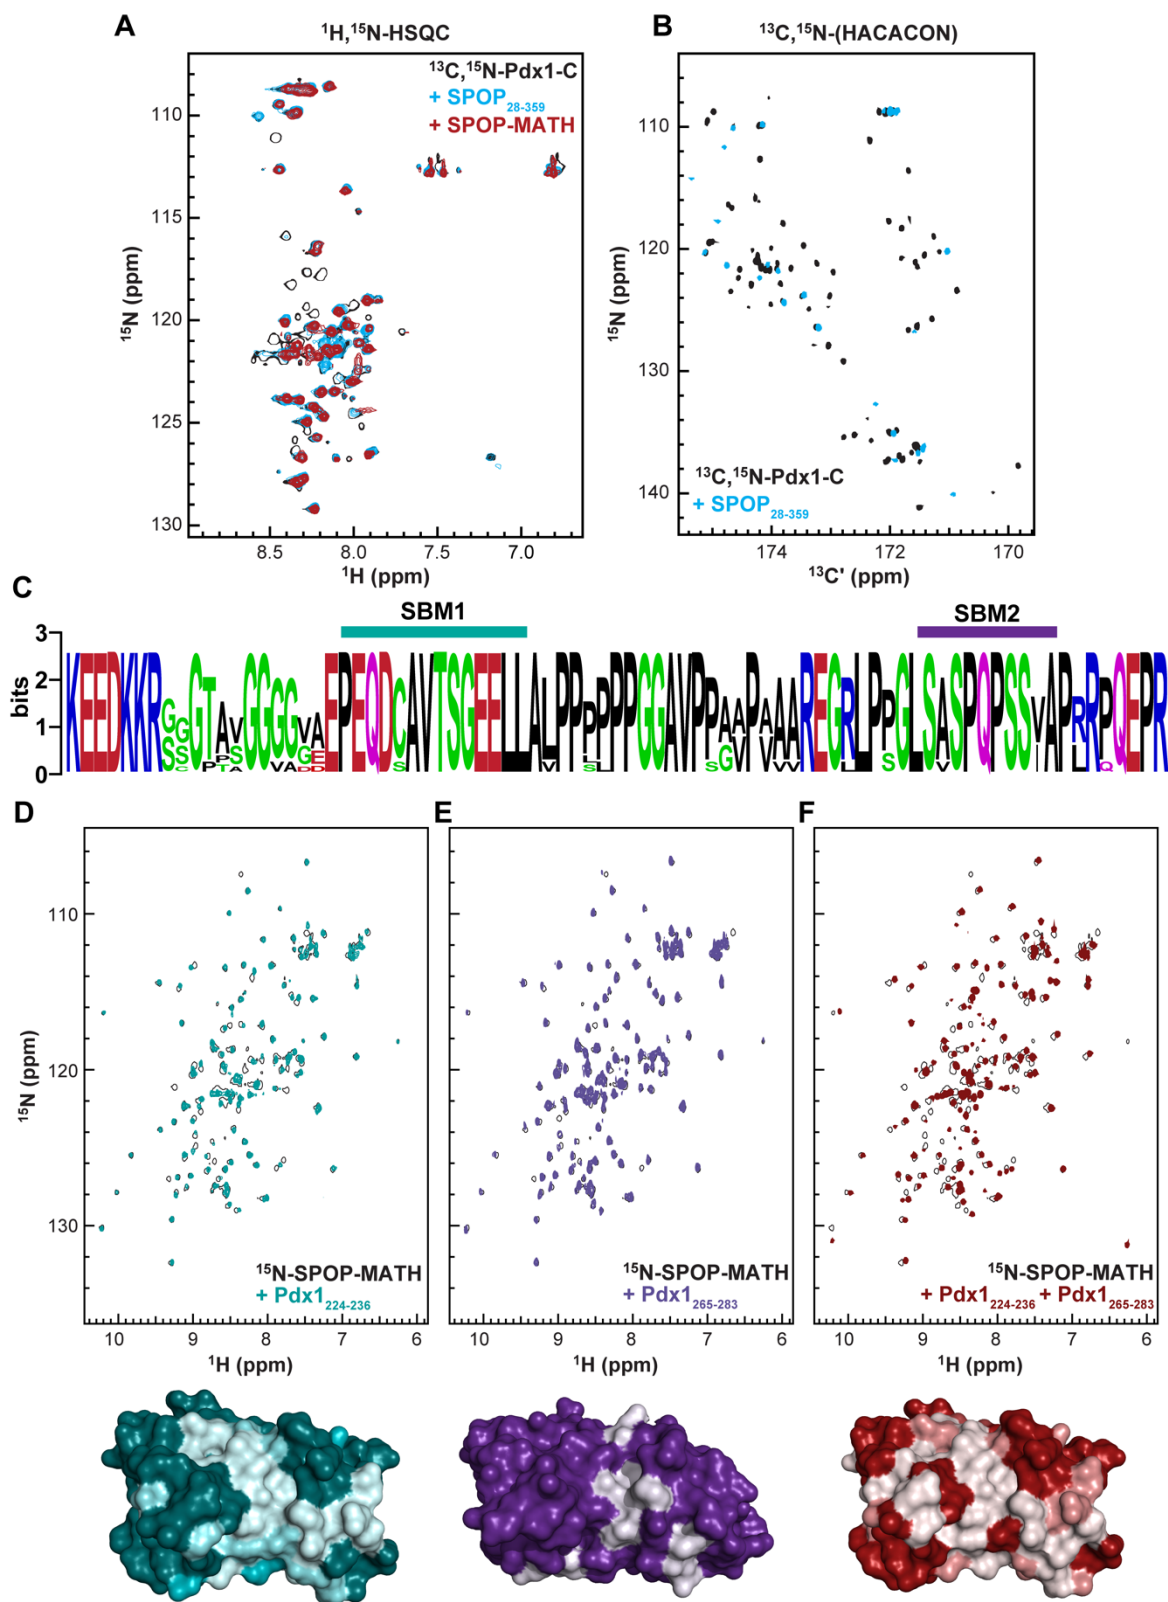

Figure S1: Pdx1-C contains two motifs that interact with SPOP-MATH (related to Figure 3).

- (A)  $^1\text{H}$ ,  $^{15}\text{N}$  HSQC spectrum of Pdx1-C (hollow black resonances) with the addition of either one molar equivalent of SPOP-MATH (red resonances) or four molar equivalents of SPOP<sub>28-359</sub> (cyan resonances). With the exception of a few peaks, the spectra of SPOP-MATH-bound Pdx1-C and SPOP<sub>28-359</sub>-bound Pdx1-C are highly comparable.
- (B)  $^{13}\text{C}$ ,  $^{15}\text{N}$  (HACA)CON spectrum of Pdx1-C (hollow black resonances) with the addition of 4 molar equivalents of SPOP<sub>28-359</sub> (cyan resonances). Intensity change analysis using SPOP<sub>28-359</sub>-bound Pdx1-C was not pursued due to substantial line broadening when oligomeric SPOP was introduced to Pdx1-C.
- (C) Weblogo representing the multiple sequence alignment of Pdx1 C-terminal IDRs from *H. sapiens*, *M. musculus*, *M. auratus*, *R. norvegicus*, *G. gorilla*, *A. melanoleuca*, *P. troglodytes*, and *P. paniscus*. The SB motif sequences are denoted above by teal and purple bars. The weblogo graphic was generated using the T-Coffee multiple sequence alignment tool (56).
- (D) Overlaid NMR spectra of SPOP-MATH alone (hollow black resonances) and four molar equivalents of a peptide corresponding to Pdx1-SBM1 (teal resonances). The per residue intensity change is mapped on the surface of SPOP-MATH (absent Puc peptide) from PDB ID: 3IVV.
- (E) Overlaid NMR spectra of SPOP-MATH alone (hollow black resonances) and a peptide corresponding to four molar equivalents of Pdx1-SBM2 (purple resonances). SPOP-MATH resonance intensity changes are plotted as described in (D). SBM2 addition leads to fewer intensity changes, but those that are observed map well to the canonical substrate-binding groove.
- (F) Overlaid NMR spectra of SPOP-MATH alone (hollow black resonances) and four molar equivalents of both SBM1 and SBM2 peptides. SPOP-MATH resonance intensity changes are plotted as described in (D) and largely resemble the binding of SBM1 alone, suggesting that a direct competition between the two Pdx1 SB motifs allows preferential binding of the stronger peptide (SBM1).

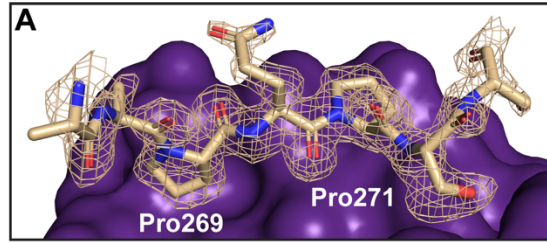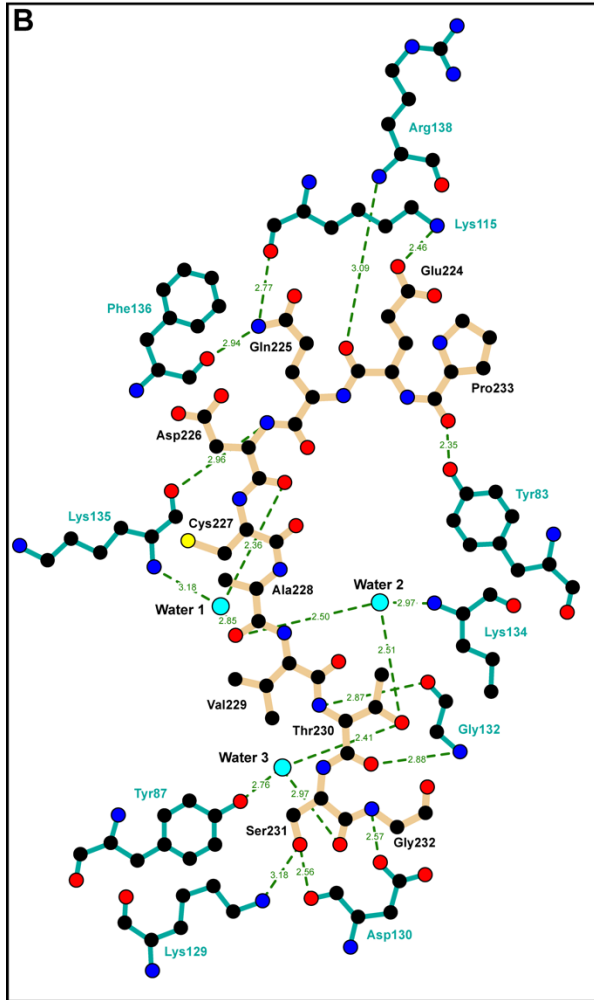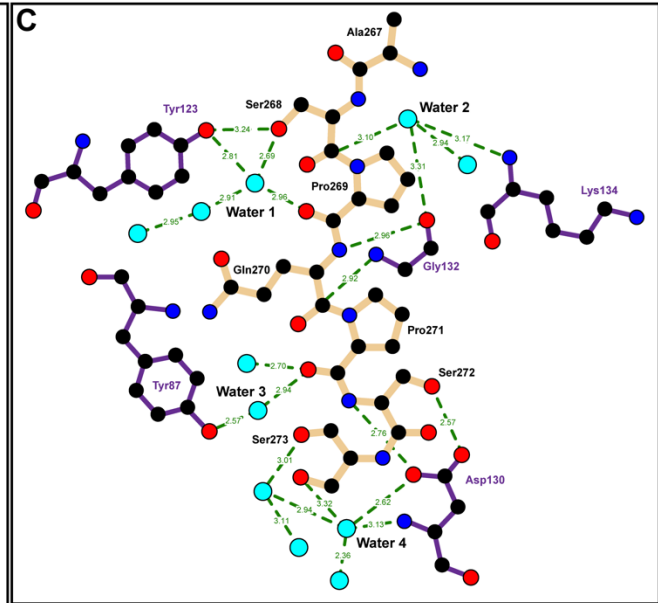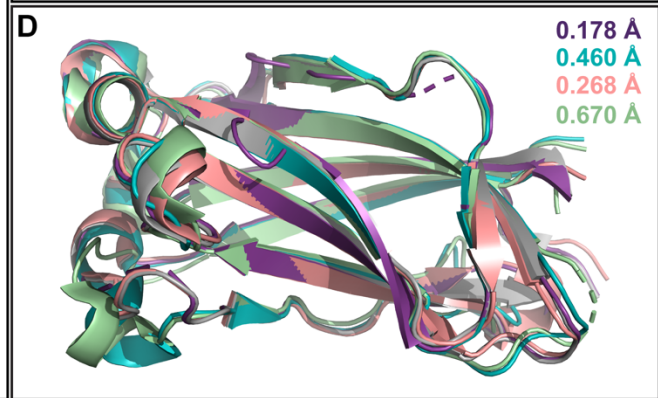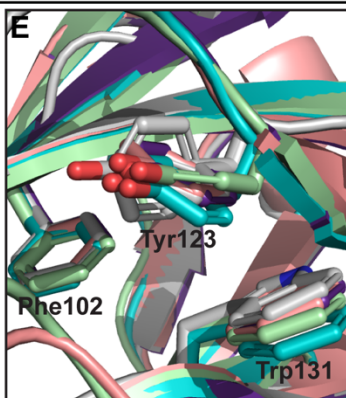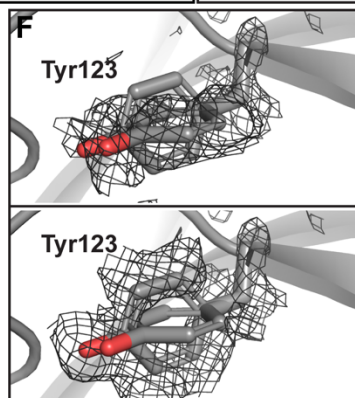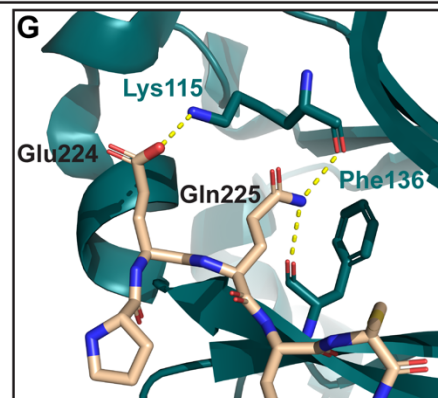

*Figure S2: Structural characterization of Pdx1-SPOP leads to new insights about broader SPOP function (related to Figure 4).*

(A) Omit map of Pdx1-SBM2 peptide contoured at  $+3\sigma$  (mesh). The electron density clearly conveys the location and orientation of the proline residues (P269 and P271) in the SBM2-SPOP-MATH structure.

(B) Hydrogen bonding network of Pdx1-SBM1 to SPOP-MATH (from PDB ID: 6F8F). Specific contacts are tabulated in Table S3.

(C) Hydrogen bonding network of Pdx1-SBM2 to SPOP-MATH (this paper). Diagrams were made in LigPlot+ (57). Specific contacts are tabulated in Table S3.

(D) Alignment of SPOP-MATH chains from several co-crystal structures. Peptides were deleted from the structures for display purposes. Each structure was aligned to the structure of unbound SPOP-MATH (gray) and the all-atom RMSD for each was calculated in PyMol. Structures are color-coded as follows: Pdx1-SBM2 (purple, this work), Pdx1-SBM1 (teal, 6F8F), Puc (pink, 3IVV), MacroH2A (green, 3IVB).

(E) Analysis of aligned SPOP-MATH chains bound to various substrates shows a 90-degree rotation of the side chain of Tyr123 between the unbound and bound structures (colored according to (D)).

(F) The difference map (contoured at  $+1.5\sigma$ ) generated from unbound SPOP-MATH modeled with only one Tyr123 conformation shows positive density orthogonal to the conformation that is adopted in all bound-state structures. Two conformations of the Tyr123 side chain with a difference map are shown (top and bottom). This residue-specific change may permit peptide occupancy in the hydrophobic pocket and/or be coupled to the expulsion of water from pocket upon binding.

(G) Glu224 and Gln225 of Pdx1 lie upstream of the established SBM consensus sequence and make specific contacts with Lys115 on SPOP-MATH in the SBM-SPOP-MATH structure (PDB ID: 6F8F).

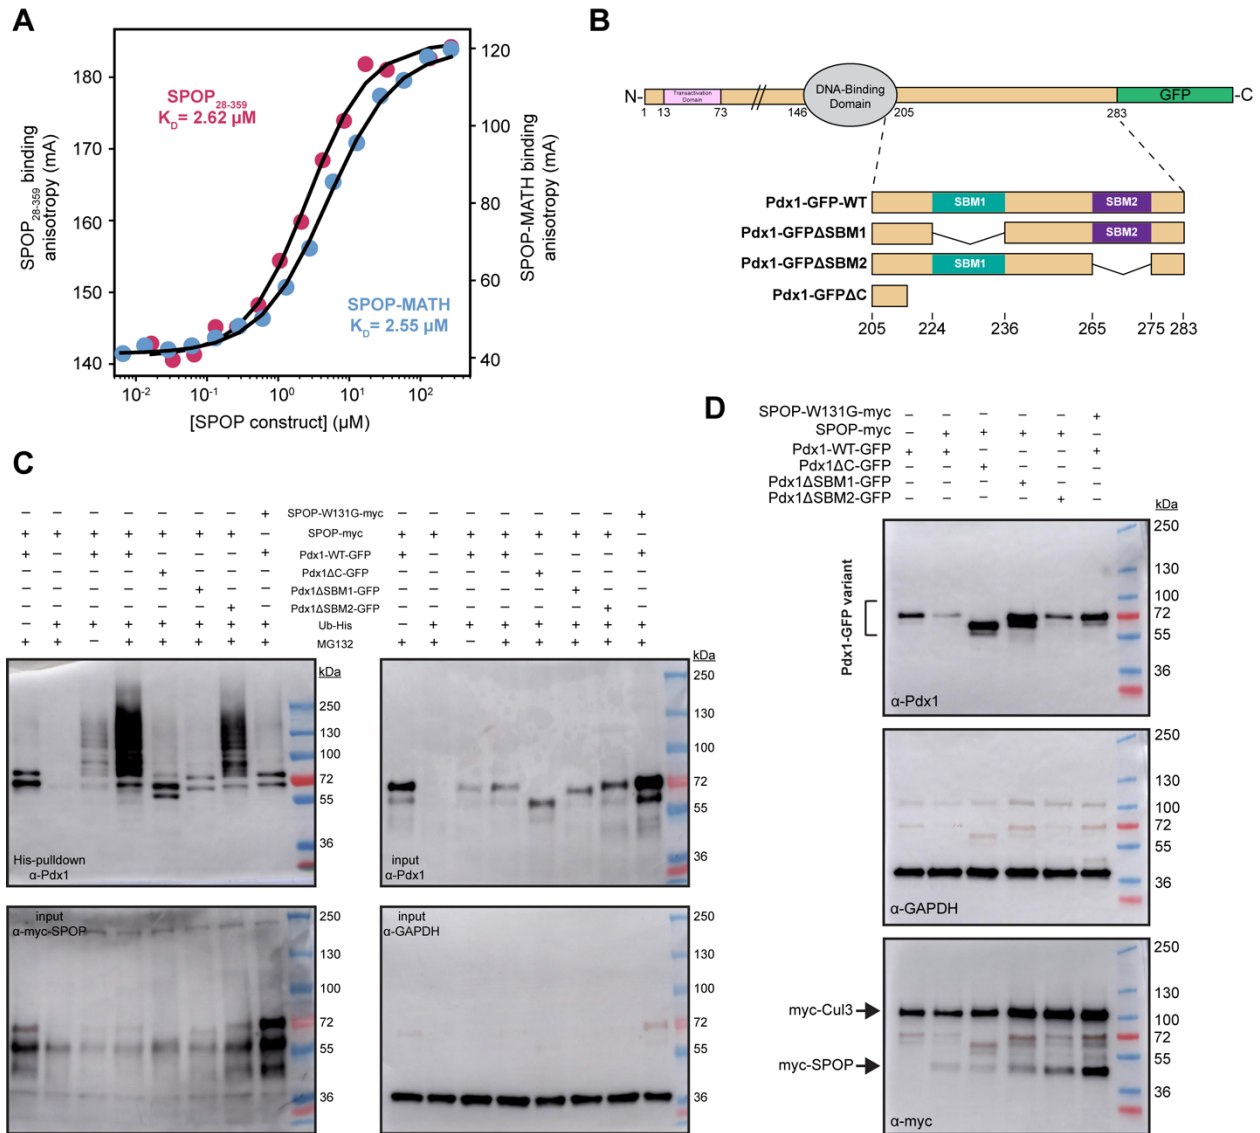

$\Delta$ SBM1 is markedly more stable than the WT and Pdx1- $\Delta$ SBM2 is still degraded to an extent but is slightly more stable than WT. Note that myc-SPOP migrates between 36 and 55 kDa and myc-Cul3 migrates just above 100 kDa.

Table S1: Pdx1 mutations found in patients with pancreas-linked diseases.

| Mutation                                  | Disease                    |
|-------------------------------------------|----------------------------|
| C18R*                                     | Type 2 Diabetes            |
| P33T*                                     | MODY4                      |
| Q59L*                                     | Type 2 Diabetes            |
| P63 frameshift (resulting in truncation)* | Pancreatic agenesis, MODY4 |
| D76N*                                     | Type 2 Diabetes, MODY3     |
| E178G                                     | Neonatal Diabetes          |
| R197H                                     | Type 2 Diabetes            |
| G212R*                                    | MODY3                      |
| E224K*                                    | MODY4                      |
| P239Q*                                    | MODY3                      |
| In-frame proline insertion after P242*    | Type 2 Diabetes            |

\*mutations found in the Pdx1 IDRs

Table S2: X-ray data collection and refinement statistics.

|                                      | SPOP-MATH                           | Pdx1SBM2/SPOP-MATH     |
|--------------------------------------|-------------------------------------|------------------------|
| <b>Data Collection</b>               |                                     |                        |
| PDB ID                               | 7KPI                                | 7KPK                   |
| Wavelength (Å)                       | 0.999995                            | 0.799898               |
| Space group                          | C121                                | C121                   |
| Cell dimensions                      |                                     |                        |
| a, b, c (Å)                          | 62.64, 53.25, 41.60                 | 61.80, 53.98, 41.56    |
| $\alpha$ , $\beta$ , $\gamma$ (°)    | 90.00, 101.39, 90.00                | 90.00, 101.43, 90.00   |
| Resolution (Å)                       | 40.78-1.70 (1.73-1.70) <sup>‡</sup> | 40.30-1.71 (1.73-1.71) |
| R <sub>merge</sub>                   | 0.046 (0.316)                       | 0.045 (0.161)          |
| I/ $\sigma$                          | 46.0 (8.7)                          | 20.5 (7.7)             |
| CC <sub>1/2</sub>                    | (0.98)                              | (0.95)                 |
| Completeness (%)                     | 96.9 (93.5)                         | 87.6 (81.9)            |
| Redundancy                           | 7.6 (7.7)                           | 3.4 (3.0)              |
|                                      |                                     |                        |
| <b>Refinement</b>                    |                                     |                        |
| No. reflections                      | 14,542                              | 12,920                 |
| R <sub>free</sub> test set           | 730 (5.02%)                         | 649 (5.02%)            |
| R <sub>work</sub> /R <sub>free</sub> | 0.160/0.196                         | 0.181/0.227            |
| No. atoms                            | 1,335                               | 1,238                  |
| Protein                              | 1,189                               | 1,084                  |
| Peptide                              | --                                  | 46                     |
| Water                                | 146                                 | 108                    |
| Average B (Å <sup>2</sup> )          | 18.0                                | 18.0                   |
| Solvent B (Å <sup>2</sup> )          | 49.9                                | 52.4                   |
| R.M.S. deviations                    |                                     |                        |
| Bond length (Å)                      | 0.011                               | 0.014                  |
| Bond angle (°)                       | 1.20                                | 1.30                   |



|                                  |            |            |
|----------------------------------|------------|------------|
| Ramachandran favored/allowed (%) | 98.55/1.45 | 97.74/2.26 |
| Clashscore, all (%ile)           | 5.04 (94%) | 5.74 (92%) |

‡values in parentheses refer to the high-resolution shell

Table S3: Select polar contacts between Pdx1-SBMs and SPOP-MATH.

|             | Pdx1 Residue | SPOP Residue | Water molecule | Distance (Å) |
|-------------|--------------|--------------|----------------|--------------|
| <b>SBM1</b> | P223 (bb)    | Y83 (sc)     |                | 2.3          |
|             | E224 (sc)    | K115 (sc)    |                | 2.5          |
|             | Q225 (sc)    | K115 (bb)    |                | 2.8          |
|             | D226 (bb)    | K125 (bb)    |                | 3.4          |
|             | D226 (bb)    |              | Water 1        | 2.4          |
|             |              | K135 (bb)    | Water 1        | 3.2          |
|             | A228 (bb)    |              | Water 1        | 2.9          |
|             | A228 (bb)    |              | Water 2        | 2.5          |
|             |              | K134 (bb)    | Water 2        | 3.0          |
|             | T230 (sc)    |              | Water 3        | 2.5          |
|             | S231 (bb)    |              | Water 3        | 3.0          |
|             |              | Y87          | Water 3        | 2.8          |
|             | S231 (sc)    | K129         |                | 3.2          |
|             |              |              |                |              |
| <b>SBM2</b> | S268 (sc)    |              | Water 1        | 2.9          |
|             | S268 (sc)    | Y123 (sc)    | Water 1        | 3.2          |
|             |              | Y123 (sc)    | Water 1        | 2.8          |
|             | S268 (bb)    |              | Water 2        | 3.6          |
|             |              | K134 (bb)    | Water 2        | 2.9          |
|             |              | G132 (bb)    | Water 2        | 3.2          |
|             | Q270 (bb)    | G132 (bb)    |                | 3.0          |
|             | P271 (bb)    |              | Water 3        | 3.0          |
|             |              | Y87 (sc)     | Water 3        | 2.6          |
|             | S272 (bb)    | D130 (sc)    |                | 2.8          |
|             | S272 (sc)    | D130 (sc)    |                | 2.6          |
|             |              | D130 (sc)    | Water 4        | 2.6          |
|             | S273 (sc)    |              | Water 4        | 3.4          |

Table S4: Binding affinities of Pdx1 toward SPOP-MATH and SPOP<sub>28-359</sub>.

| Competitor                              | Residue #s | Sequence                       | K <sub>D</sub> (μM) <sup>†</sup> |
|-----------------------------------------|------------|--------------------------------|----------------------------------|
| <b>Binding to SPOP-MATH</b>             |            |                                |                                  |
| Puc                                     | 91-106     | ENLACDEVTSTTSSST               | 2.6 ± 0.4                        |
| Pdx1-C                                  | 204-283    | recombinant protein (see STAR) | 32 ± 5                           |
| Pdx1-SBM1f                              | 224-232    | EQDCAVTSCEE                    | 140 ± 55                         |
| Pdx1-SBM2                               | 265-283    | LSASPQPSSVAPRRPQEPR            | 630 ± 80                         |
| Mock (Fcp1)                             | 941-961    | GSSEADEMAKALEELNDLM            | no binding                       |
| <b>Binding to SPOP<sub>28-359</sub></b> |            |                                |                                  |
| Puc                                     | 91-106     | ENLACDEVTSTTSSST               | 2.6 ± 1.0                        |
| Pdx1-C                                  | 204-283    | recombinant protein (see STAR) | 3.5 ± 1.5                        |

<sup>†</sup>Dissociation constants reported in μM; error shown is the standard deviation from the mean of three independent replicates

Table S5: Key reagents and resources (see Experimental Procedures)

| Reagent/Resource                       | Source                | Identifier                            |
|----------------------------------------|-----------------------|---------------------------------------|
| <b>Experimental Models: Cell Lines</b> |                       |                                       |
| HeLa                                   | Xin Zhang, Penn State | N/A                                   |
| T-REx-293                              | Invitrogen            | Cat# R710-07;<br>RRID:CVCL_D585       |
| <b>Recombinant DNA</b>                 |                       |                                       |
| pET49b-Pdx1C                           | (36)                  | N/A                                   |
| pET49b-SPOP MATH (28-166)              | This paper            | N/A                                   |
| pBAD-SPOP (28-359)                     | (21)                  | N/A                                   |
| pET28a-3CPro                           | Linda Nicholson       | N/A                                   |
| pMal-C2-TEV S219V                      | (58)                  | Addgene #8827;<br>RRID:Addgene_8827   |
| pcDNA3.1-Pdx1-eGFP                     | This paper            | N/A                                   |
| pcDNA3.1-Pdx1ΔSBM1-eGFP                | This paper            | N/A                                   |
| pcDNA3.1-Pdx1ΔSBM2-eGFP                | This paper            | N/A                                   |
| pcDNA3.1-Pdx1ΔC-eGFP                   | This paper            | N/A                                   |
| pcDNA3-V5-SPOP                         | (21)                  | N/A                                   |
| pcDNA3-V5-SPOP W131G                   | (23)                  | N/A                                   |
| pcDNA-His6-Ubiquitin                   | Wenyi Wei             | N/A                                   |
| pcDNA3-HA2-ROC1 (Rbx1)                 | (59)                  | Addgene #19897;<br>RRID:Addgene_19897 |
| pcDNA3-myc-CUL3                        | (59)                  | Addgene #19893;<br>RRID:Addgene_19893 |
| pcDNA4/OT/myc-SPOP                     | This paper            | N/A                                   |
| <b>Antibodies</b>                      |                       |                                       |

|                                                                                     |                                      |                                     |
|-------------------------------------------------------------------------------------|--------------------------------------|-------------------------------------|
| Chicken Polyclonal anti-V5                                                          | Novus Biologicals                    | Cat# NB600-379;<br>RRID:AB_10003214 |
| Mouse Monoclonal anti-SC-35                                                         | Abcam                                | Cat# ab11826;<br>RRID:AB_298608     |
| Goat Polyclonal anti-Chicken IgG, AF555-conjugated                                  | Invitrogen                           | Cat# A21437;<br>RRID:AB_1500593     |
| Goat Polyclonal anti-Mouse IgG, AF647-conjugated                                    | Invitrogen                           | Cat# A21235;<br>RRID:AB_2535804     |
| Mouse Monoclonal anti-Pdx1                                                          | R&D Systems                          | Cat# MAB2419;<br>RRID:AB_10548285   |
| Mouse Monoclonal anti-myc                                                           | Santa Cruz Biotechnology             | Cat# 9E10                           |
| Rabbit Monoclonal anti-GAPDH                                                        | Abcam                                | Cat# EPR1689                        |
| Goat Polyclonal anti-Mouse IgG                                                      | Jackson ImmunoResearch Laboratories  | Cat# 111-035-003                    |
| Goat Polyclonal anti-Rabbit IgG                                                     | Jackson ImmunoResearch Laboratories  | Cat# 115-035-003                    |
| <b>Oligonucleotides</b>                                                             |                                      |                                     |
| Pdx1-GFP aa224-236 deletion ( $\Delta$ SBM1)<br>FWD: GCACTTCCTCCGCCTCCA             |                                      |                                     |
| Pdx1-GFP aa224-236 deletion ( $\Delta$ SBM1)<br>REV: AGGCTCAGCAACTCCGCC             |                                      |                                     |
| Pdx1-GFP aa262-275 deletion ( $\Delta$ SBM2)<br>FWD:<br>CCTAGACGGCCTCAAGAGCCCCGG    |                                      |                                     |
| Pdx1-GFP aa262-275 deletion ( $\Delta$ SBM2)<br>REV:<br>GCCAGGAGGCAATCTGCCTTCTCTGGC |                                      |                                     |
| Pdx1-GFP aa220-283 deletion ( $\Delta$ C) FWD:<br>GGATCCACTAGTCCAGTGTG              |                                      |                                     |
| Pdx1-GFP aa220-283 deletion ( $\Delta$ C) REV:<br>AACTCCGCCACCTCCAAC                |                                      |                                     |
| <b>Chemicals, Enzymes, and Other Reagents</b>                                       |                                      |                                     |
| ammonium chloride ( $^{15}\text{N}$ , 99%)                                          | Cambridge Isotope Laboratories, Inc. | Cat# NLM-467-PK                     |
| D-glucose ( $\text{U-}^{13}\text{C}_6$ , 99%)                                       | Cambridge Isotope Laboratories, Inc. | Cat# CLM-1396-PK                    |
| f-Puc: (FITC)-ENLACDEVTSTTSSSSST-NH <sub>2</sub>                                    | Genscript                            | (22)                                |
| <b>Software</b>                                                                     |                                      |                                     |

|               |                                                                                                                                                                                             |                                                                                                                                                                            |
|---------------|---------------------------------------------------------------------------------------------------------------------------------------------------------------------------------------------|----------------------------------------------------------------------------------------------------------------------------------------------------------------------------|
| NEBaseChanger | <a href="https://nebasechanger.neb.com">https://nebasechanger.neb.com</a>                                                                                                                   |                                                                                                                                                                            |
| FIJI          | (53)                                                                                                                                                                                        | <a href="http://fiji.sc">http://fiji.sc</a> ;<br>RRID:SCR_002285                                                                                                           |
| Zen software  | <a href="http://www.zeiss.com/corporate/en_de/global/home.html">http://www.zeiss.com/corporate/en_de/global/home.html</a>                                                                   | RRID:SCR_013672                                                                                                                                                            |
| TopSpin       | <a href="https://www.bruker.com/products/mr/nmr/nmr-software/nmr-software/topspin/overview.html">https://www.bruker.com/products/mr/nmr/nmr-software/nmr-software/topspin/overview.html</a> | RRID:SCR_014227                                                                                                                                                            |
| NMRFAM_Sparky | (46)                                                                                                                                                                                        | <a href="https://nmrfam.wisc.edu/nmrfam-sparky-distribution/">https://nmrfam.wisc.edu/nmrfam-sparky-distribution/</a>                                                      |
| Spyder        | <a href="https://www.spyderide.org">https://www.spyderide.org</a>                                                                                                                           | RRID:SCR_017585                                                                                                                                                            |
| HKL-2000      | (47)                                                                                                                                                                                        | <a href="https://www.hkl-xray.com">https://www.hkl-xray.com</a> ;<br>RRID:SCR_015547                                                                                       |
| CCP4          | (48)                                                                                                                                                                                        | <a href="https://www.ccp4.ac.uk">https://www.ccp4.ac.uk</a> ;<br>RRID:SCR_007255                                                                                           |
| Phaser-MR     | (49)                                                                                                                                                                                        | <a href="https://www.phenix-online.org/documentation/reference/phasermr.html">https://www.phenix-online.org/documentation/reference/phasermr.html</a> ;<br>RRID:SCR_014219 |
| Coot          | (50)                                                                                                                                                                                        | <a href="https://www2.mrc-lmb.cam.ac.uk/personal/pemsley/coot/">https://www2.mrc-lmb.cam.ac.uk/personal/pemsley/coot/</a> ;<br>RRID:SCR_014222                             |
| REFMAC5       | (51)                                                                                                                                                                                        | RRID:SCR_014225                                                                                                                                                            |
| PyMOL         | <a href="https://pymol.org/2/">https://pymol.org/2/</a>                                                                                                                                     | RRID:SCR_000305                                                                                                                                                            |
| MolProbity    | (52)                                                                                                                                                                                        | <a href="http://molprobity.biochem.duke.edu">http://molprobity.biochem.duke.edu</a> ;<br>RRID:SCR_014226                                                                   |
| Ligplot+      | (57)                                                                                                                                                                                        | <a href="https://www.ebi.ac.uk/thornton-srv/software/LigPlus/">https://www.ebi.ac.uk/thornton-srv/software/LigPlus/</a> ;<br>RRID:SCR_018249                               |
| T-Coffee      | (56)                                                                                                                                                                                        | <a href="http://tcoffee.crg.cat">http://tcoffee.crg.cat</a> ;<br>RRID:SCR_011818                                                                                           |
